# Supplementary material for: In Silico Functional Pathway Annotation of 86 Established Prostate Cancer Risk Variants
Source: PLoS One. 2015 Feb 6;10(2):e0117873. doi: 10.1371/journal.pone.0117873 (PMC4320069; doi:10.1371/journal.pone.0117873)
Supplement: S4 Table — (XLSX) [file pone.0117873.s004.xlsx]

## Sheet: Sheet1
Supplemental Table 4. Identification of upstream regulators and pathways based on the list of genes flanking the prostate cancer risk variants
Upstream Regulator	Molecule Type	p-value of overlap	Target molecules in dataset
androgen	chemical - other	2.55E-08	AR,FGF10,FGFR2,KLF5,KLK2,KLK3,MYC,NKX3-1,SOX9
AR	ligand-dependent nuclear receptor	7.78E-08	AR,CLDN11,FGF10,FGFR2,ITGA6,KLK2,KLK3,MSMB,MYC,NKX3-1,SOX9
LEF1	transcription regulator	7.89E-08	AR,FGF10,MMP7,MYC,SOX9,TH
Hedgehog	group	1.27E-07	GATA5,KLF4,KLK2,KLK3,MYC,SOX9
cadmium chloride	chemical toxicant	2.07E-06	AR,KLK3,MYC,NKX3-1,TERT
ESR2	ligand-dependent nuclear receptor	3.44E-06	AR,CLDN11,KLF4,KLK3,KRT8,MYC,NKX3-1,TERT
HOXB13	transcription regulator	4.40E-06	AR,KLK3,MYC
PA2G4	transcription regulator	4.40E-06	AR,KLK2,KLK3
flufenamic acid	chemical drug	4.40E-06	AR,KLK3,NKX3-1
CTNNB1	transcription regulator	4.88E-06	AR,ASCL2,CXXC4,ITGA6,KLF5,KLK2,KLK3,MMP7,MYC,TBX5,TERT,TH
lithium chloride	chemical drug	5.27E-06	AR,KLK3,MYC,SOX9,TBX5,TERT
SMO	G-protein coupled receptor	1.27E-05	CXXC4,KLK2,KLK3,MYC,SOX9
KDM4C	other	1.87E-05	KLK3,MYC
TNK2	kinase	1.87E-05	KLK2,KLK3
cyproterone acetate	chemical drug	2.21E-05	AR,KLK3,MYC
BMP4	growth factor	2.55E-05	FGFR2,KLF4,MYC,SALL3,SOX9,TBX5
TGFB1I1	transcription regulator	3.49E-05	AR,KLF4,KLK3
TGFB1	growth factor	5.17E-05	AFM,COL6A3,FERMT2,FGF10,FGFR2,GRHL1,ITGA6,KLF4,KLK3,KRT8,MMP7,MSMB,MYC,PDLIM5,RBM19,SKIL,SOX9,STC2,TERT
PMEPA1	other	5.60E-05	AR,KLK3
URI1	transcription regulator	5.60E-05	KLK3,NKX3-1
TCF4	transcription regulator	7.19E-05	MYC,SOX9,TERT,TH
ETV1	transcription regulator	7.35E-05	MMP7,SOX9,TERT
